# Supplementary material for: Comparisons of Dementia Knowledge and Attitudes among the Youth and Older Adults: Insights from the Construal Level Theory Perspective
Source: MDPI journal article supplement (doi:10.3390/ijerph19041928), 2022-02-09
Supplement: s1 [file s1]

## Questions from the questionnaire (Reference number: 2017OCT02)

### 1. Knowledge of Dementia

#### 1.1 Knowledge of Symptoms of Dementia

|    | Items                                                                     | True | False | Don't know |
|----|---------------------------------------------------------------------------|------|-------|------------|
| 1. | Difficulty in recognising people                                          |      |       |            |
| 2. | Putting things in the wrong place (eg. putting shoes in the refrigerator) |      |       |            |
| 3. | Slower thinking                                                           |      |       |            |
| 4. | Losing track of time (eg. confused about day and night)                   |      |       |            |
| 5. | Feeling lost in new places                                                |      |       |            |
| 6. | Feeling extremely tired                                                   |      |       |            |
| 7. | Losing their temper easily                                                |      |       |            |
| 8. | Feeling depressed                                                         |      |       |            |

#### 1.2 Knowledge of Risk Factors of Dementia

|     | Items                                                                     | True | False | Don't know |
|-----|---------------------------------------------------------------------------|------|-------|------------|
| 1.  | There is nothing anyone can do to reduce their risks of getting dementia  |      |       |            |
| 2.  | High blood pressure increases your chances of getting dementia            |      |       |            |
| 3.  | If one of your parents gets dementia, you are more likely to get it too   |      |       |            |
| 4.  | Smoking has nothing to do with dementia                                   |      |       |            |
| 5.  | People who drink heavily are more likely to get dementia                  |      |       |            |
| 6.  | People who take regular physical exercise are less likely to get dementia |      |       |            |
| 7.  | People who experience depression are more likely to get dementia          |      |       |            |
| 8.  | People with diabetes are more likely to get dementia                      |      |       |            |
| 9.  | Obese people are more likely to get dementia                              |      |       |            |
| 10. | People who are socially active are less likely to get dementia            |      |       |            |

## 2. Attitudes towards Dementia

|    | Items                                                                                                           | Strong<br>ly<br>agree | Agree | Neither<br>agree<br>nor<br>disagree | Disagr<br>ee | Strong<br>ly<br>disagr<br>ee |
|----|-----------------------------------------------------------------------------------------------------------------|-----------------------|-------|-------------------------------------|--------------|------------------------------|
| 1. | There comes a time when all you can do for someone with dementia is keep them clean, healthy and safe           |                       |       |                                     |              |                              |
| 2. | Once they have dementia, the person you knew eventually disappears                                              |                       |       |                                     |              |                              |
| 3. | As soon as someone is diagnosed with dementia, they are not treated like a thinking human being any more        |                       |       |                                     |              |                              |
| 4. | For people with really bad dementia life is not worth living                                                    |                       |       |                                     |              |                              |
| 5. | People with dementia are like children and need to be cared for as you would a child                            |                       |       |                                     |              |                              |
| 6. | It is better for people with dementia and their families if they are cared for in a residential or nursing home |                       |       |                                     |              |                              |
| 7. | There is little or no benefit to be gained from telling someone they have dementia                              |                       |       |                                     |              |                              |
| 8. | People who have just been diagnosed with dementia are unable to make decisions about their own care             |                       |       |                                     |              |                              |
| 9. | There is no point in trying to talk to people with dementia as they won't be able to understand                 |                       |       |                                     |              |                              |

### 3. Personal Information

1. Gender : ☐Male ☐Female
2. Are you Macao resident : ☐Yes ☐No
3. Age : \_\_\_\_\_years-old
4. Education level :  
☐No formal education ☐Primary school or below ☐Junior high school ☐High school  
☐Associate  
☐Bachelor  
☐Master's or above
5. Your current occupation : ☐Police officer ☐Bank staff ☐Bus driver ☐Taxi driver ☐  
Tourist bus driver☐ Supermarket Staff ☐ Superintendent ☐ High school student ☐  
College student ☐ Retiree ☐Other\_\_\_\_\_
- 6a. Work schedules : ☐Full-time ☐Part-time
6. Experience in caring for people with dementia : ☐Yes ☐No
7. Family and relatives with dementia : ☐Yes ☐No
8. Friends with dementia : ☐Yes ☐No
9. Participation in dementia-related activities : ☐Yes ☐No  
If yes :  
10a. What type (multiple choice) : ☐Talk ☐Workshop ☐exhibition ☐Visit ☐Other\_\_\_\_\_  
10b. Organiser (multiple choice) : ☐ Social service organisation ☐ Professional organisation  
☐ Government ☐Other\_\_\_\_\_
- 10c. When was the last time you attended  
☐Within 1 year ☐1 to less than 3 year ☐3 to less than 5 years ☐ 5 years or over

[illegible]
